# Supplementary material for: Photothermal effect: an important aspect for the enhancement of photocatalytic activity under illumination by NIR radiation
Source: Royal Society of Chemistry journal article supplement (doi:10.1039/c7qm00337d), 2017-10-10
Supplement: c7qm00337d1.pdf [file c7qm00337d1.pdf]

## Supporting Information

### Photothermal Effect: An Important Aspect for Enhancement of Photocatalytic Activity Under Illumination to NIR Radiations

Gururaj M. Neelgund and Aderemi Oki\*

Department of Chemistry, Prairie View A&M University, Prairie View, TX 77446, USA

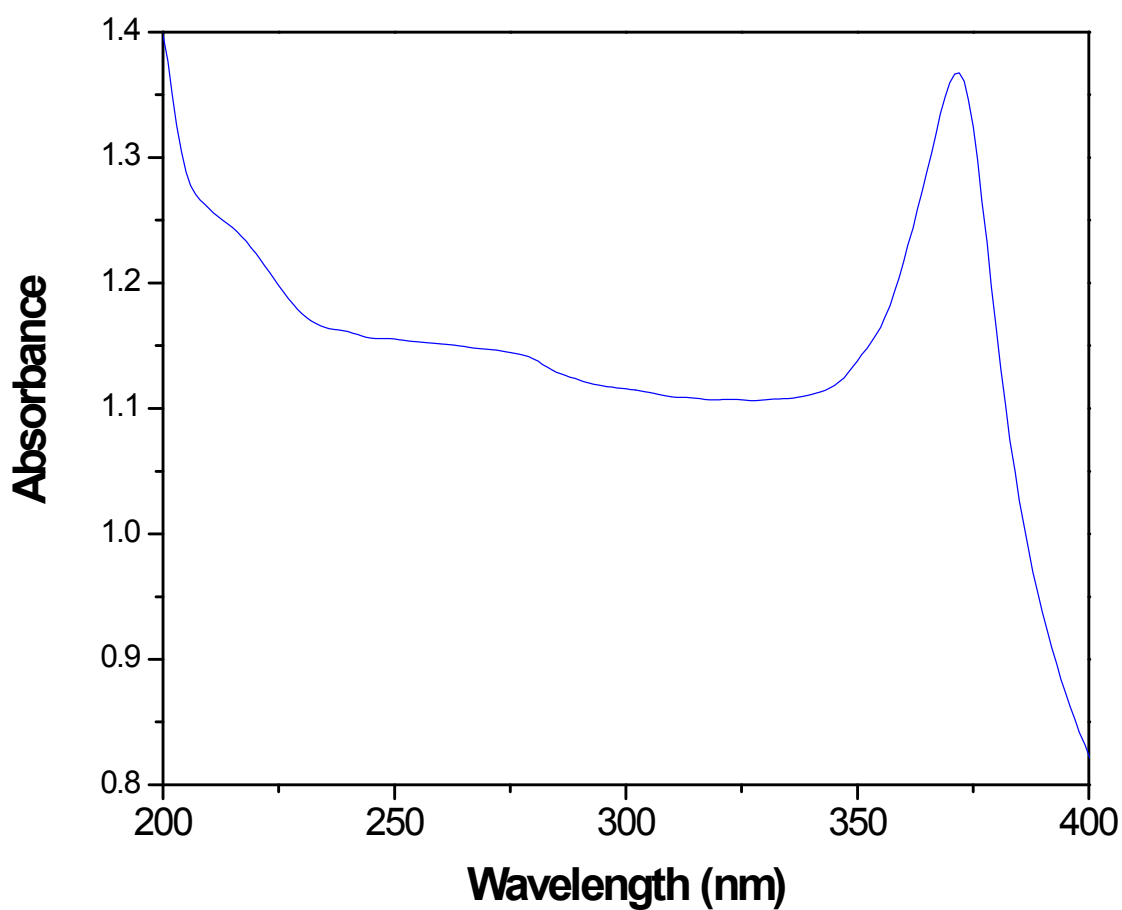

**Figure S1.** The absorption spectrum of GR-ZnO nanocatalyst in specified region.

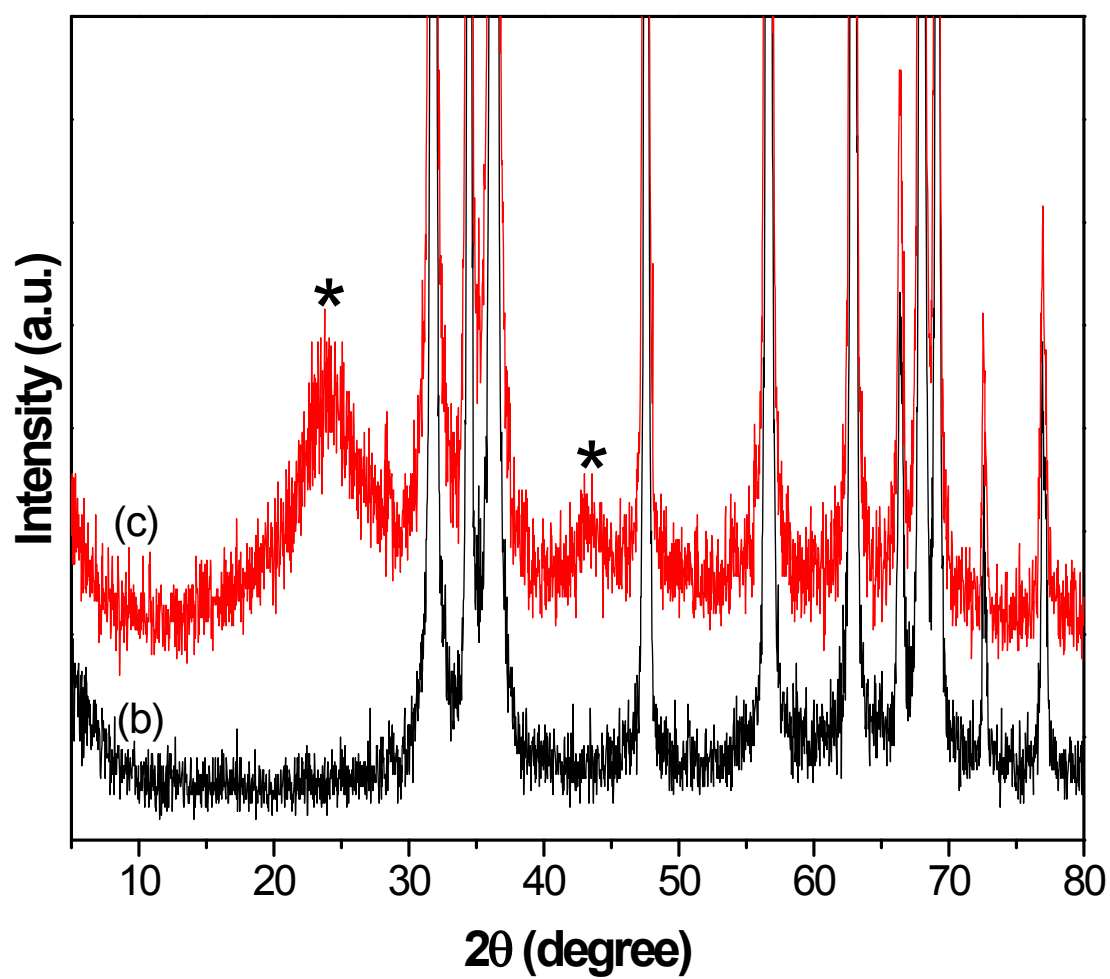

**Figure S2.** Magnified image of XRD patterns of (3b) ZnO and (3c) GR-ZnO nanocatalyst shown in Figure 3.

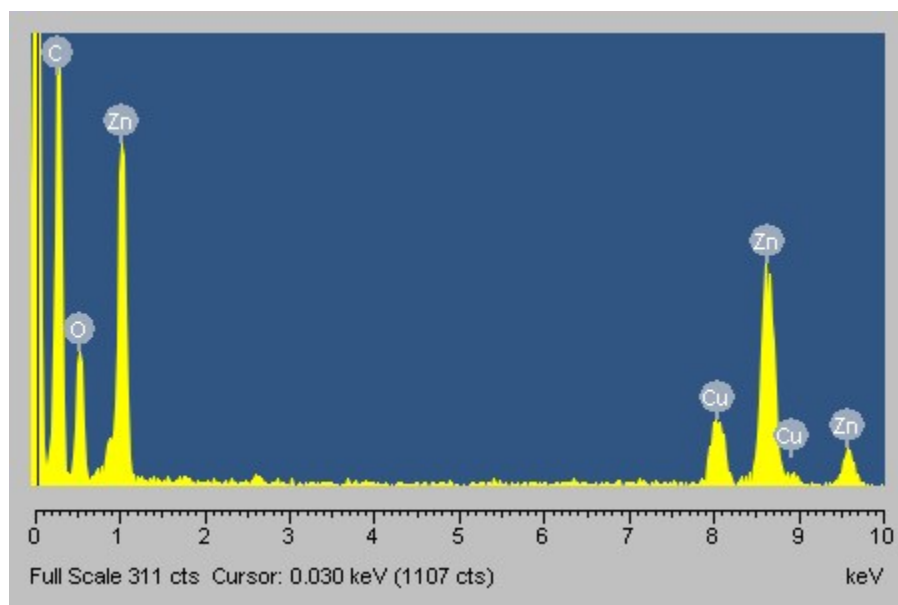

**Figure S3.** EDS of GR-ZnO nanocatalyst.

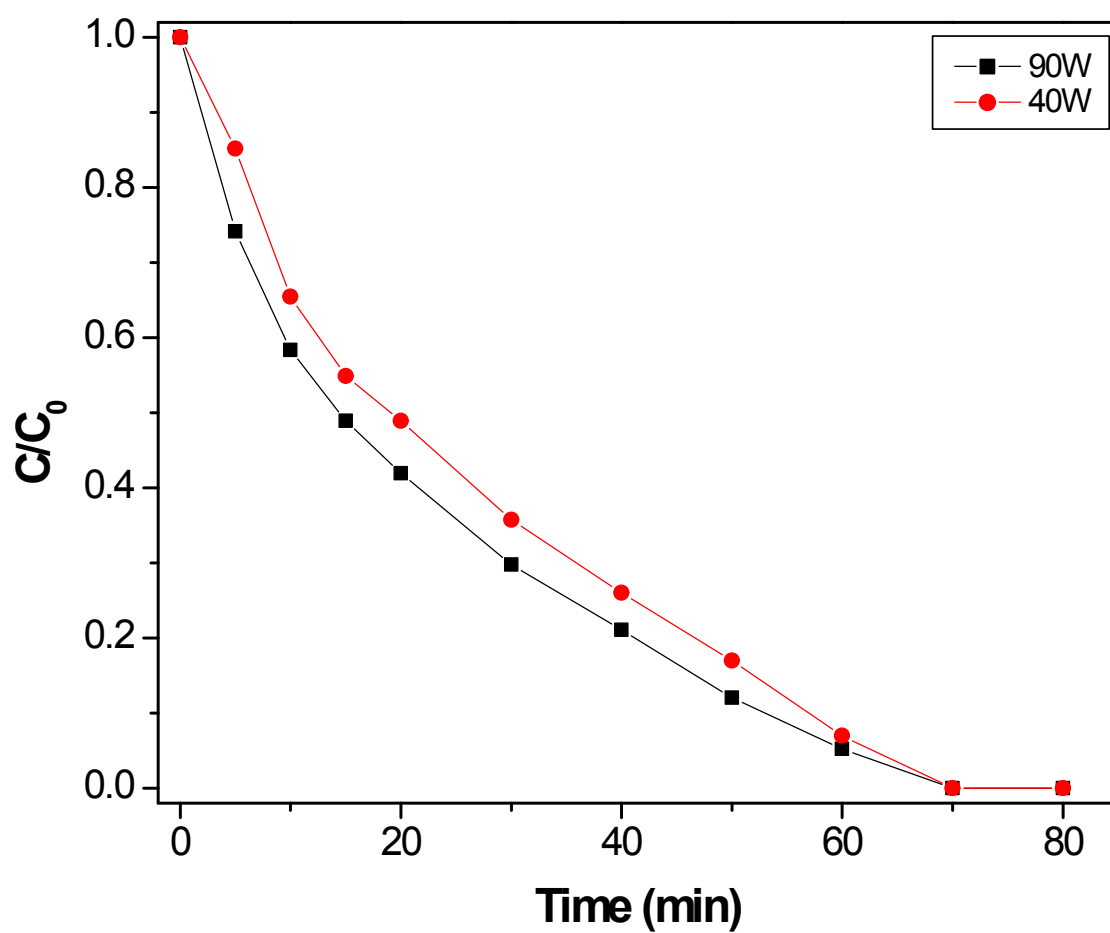

**Figure S4.** Photocatalytic degradation profile of methyl orange in presence of GR-ZnO nanocatalyst under exposure to 40 and 90W visible light.

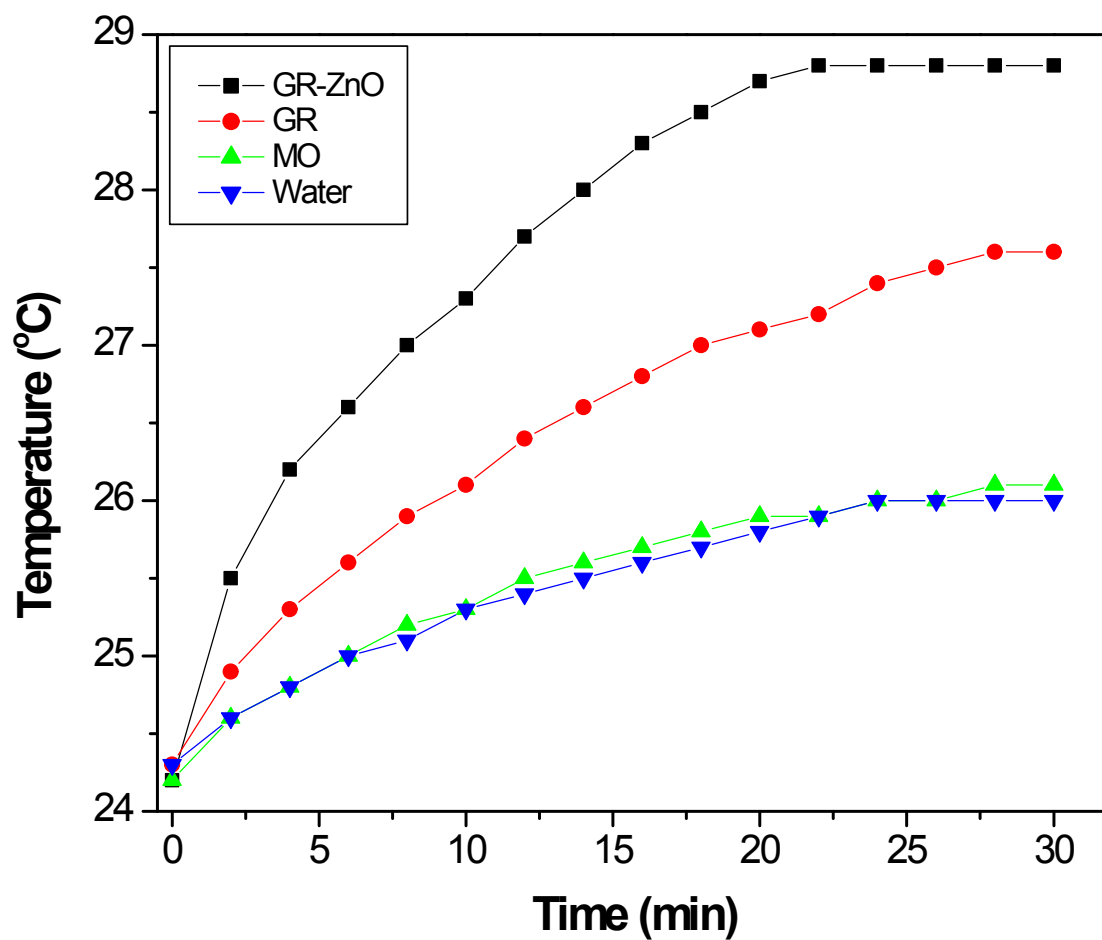

**Figure S5.** Temperature elevation measured for catalytic mixture under exposure to NIR laser without external circulation of water.

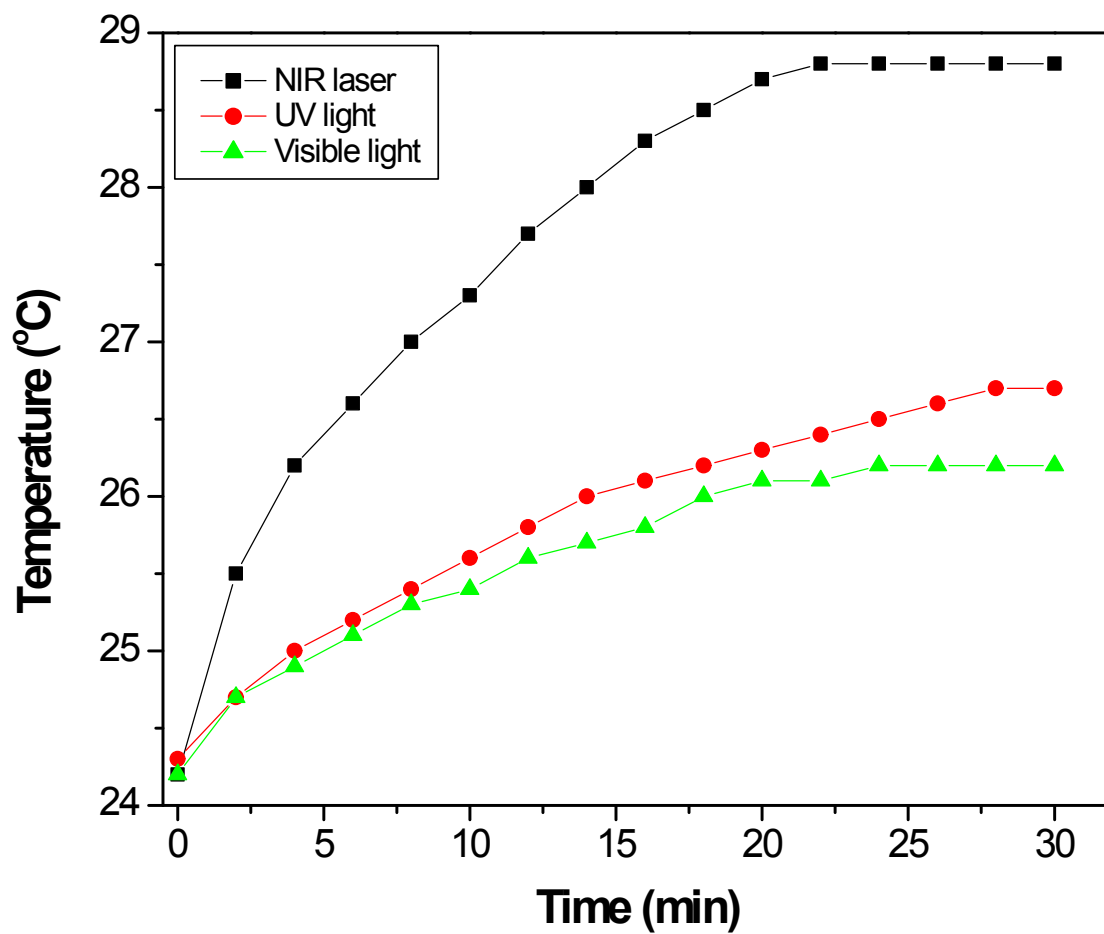

**Figure S6.** Temperature rise measured for catalytic mixture under exposure to UV light, visible light and NIR laser without external circulation of water.

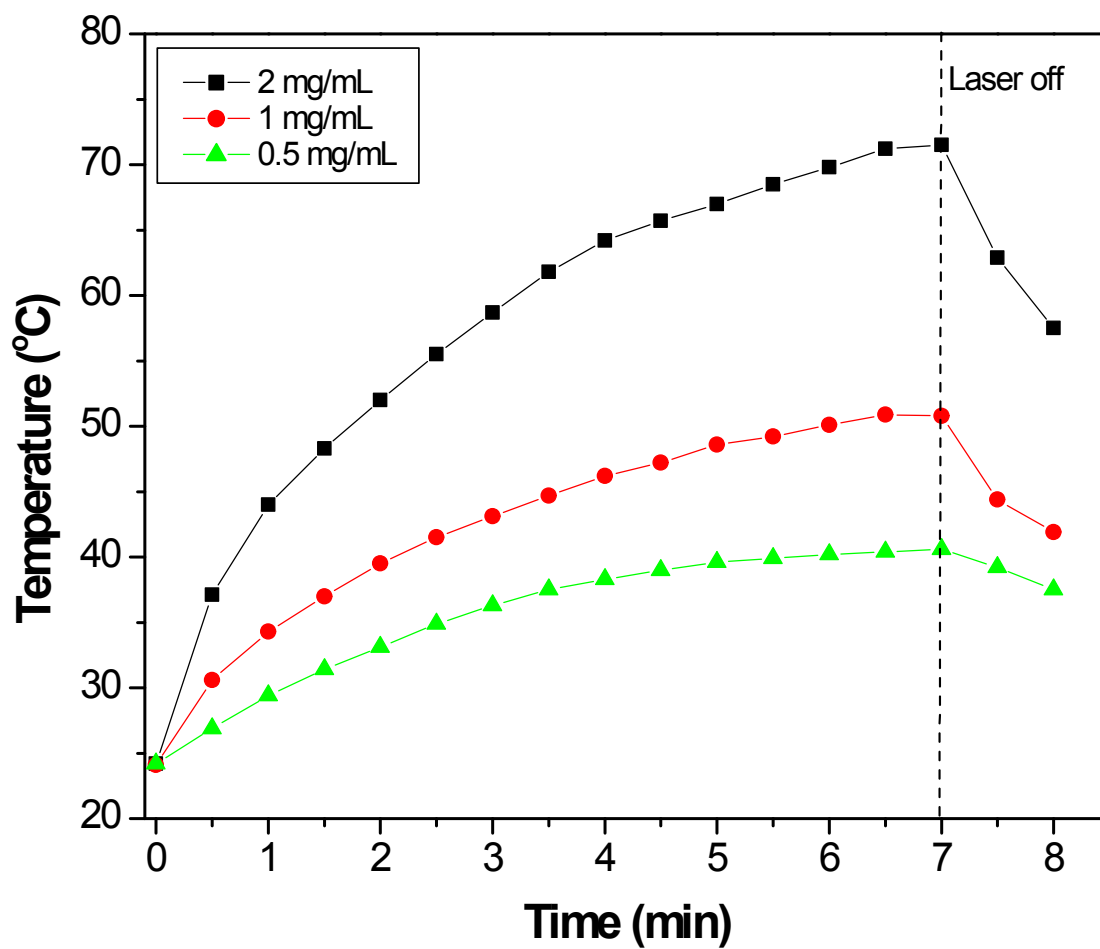

**Figure S7.** Temperature rise measured for GR-ZnO nanocatalyst under exposure 980 nm laser at its different concentration level.

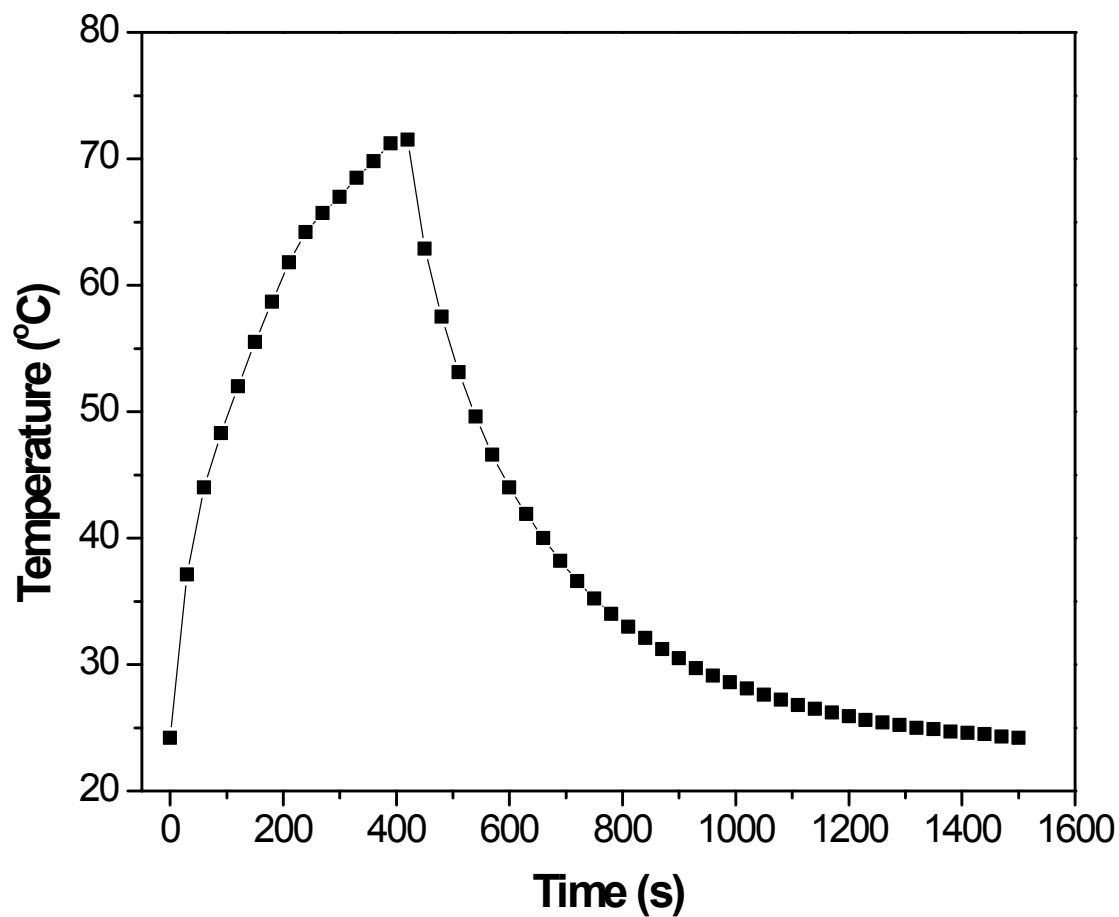

**Figure S8.** Temperature variation of aqueous dispersions of GR-ZnO nanocatalyst by irradiation with 980 nm laser for 7 min and followed by laser shut off.



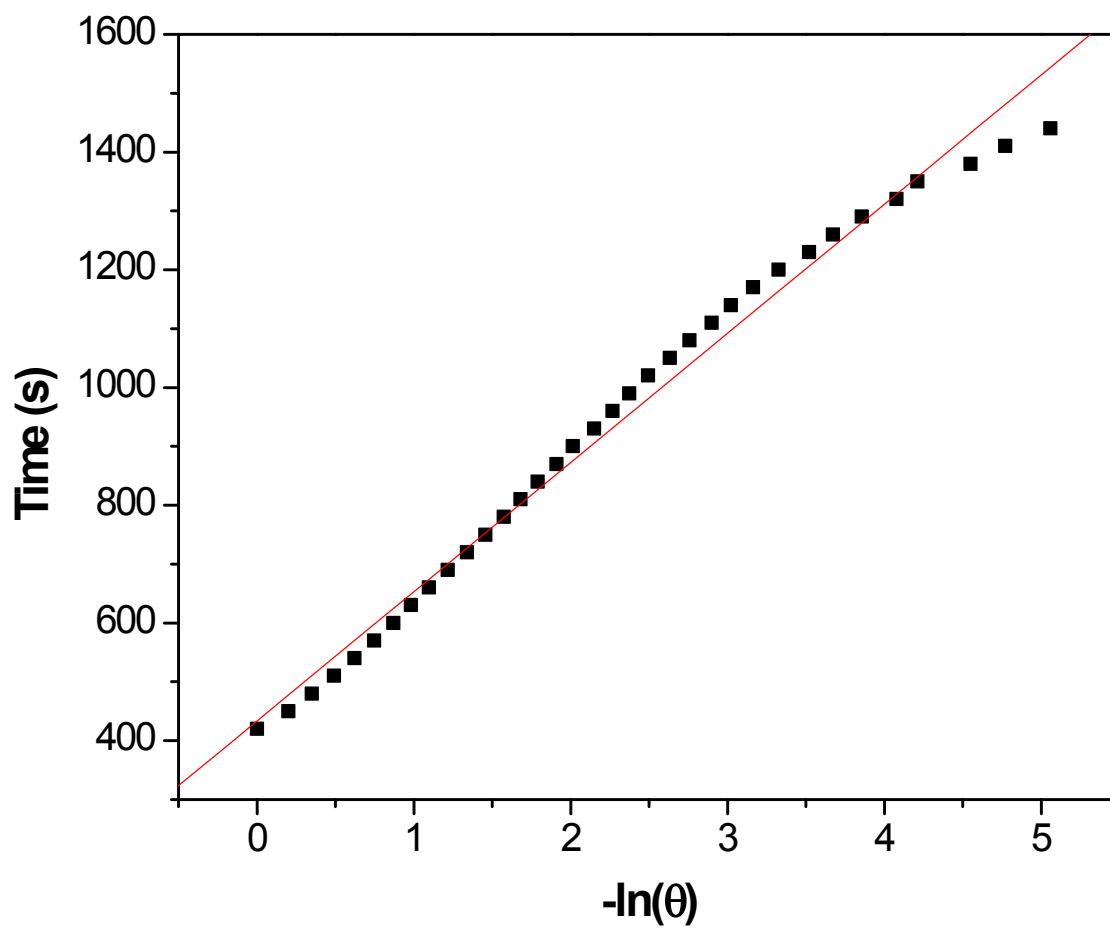

**Figure S9.** The plot of time from the cooling period versus negative natural logarithm of driving force temperature obtained for GR-ZnO nanocatalyst shown in Figure S5.

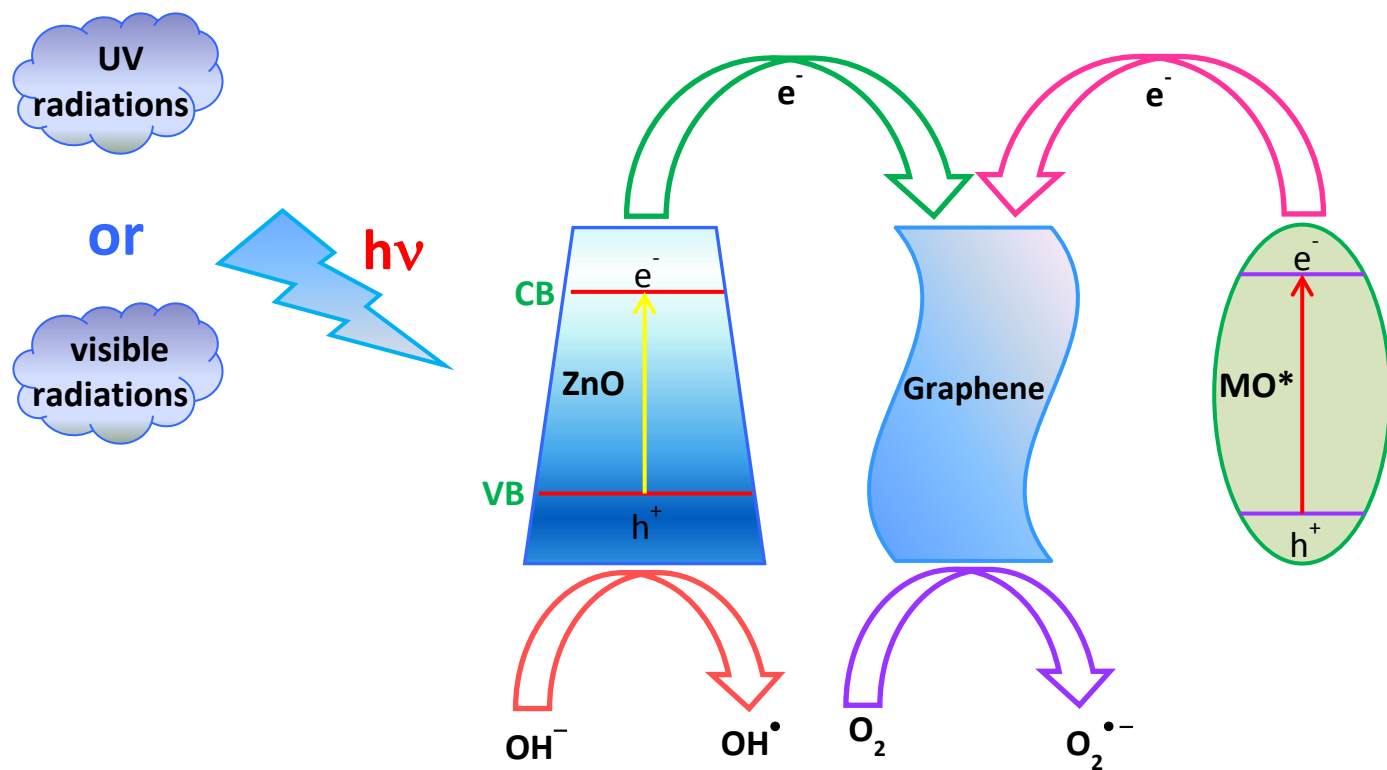

**Figure S10.** The proposed mechanism for photocatalytic degradation of methyl orange in presence of GR-ZnO nanocomposite under illumination to UV and visible light.

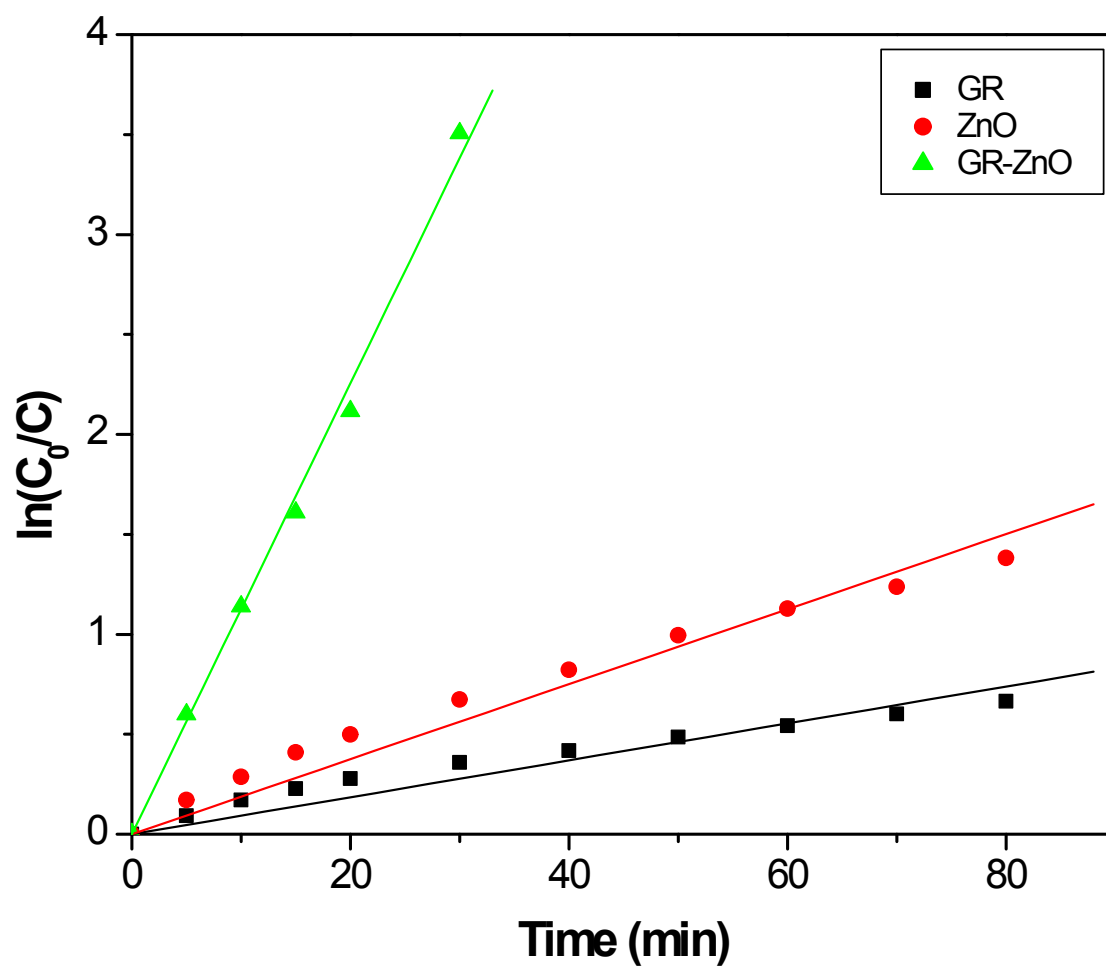

**Figure S11.** Langmuir-Hinshelwood plot for photodegradation of methyl orange under exposure to NIR laser.

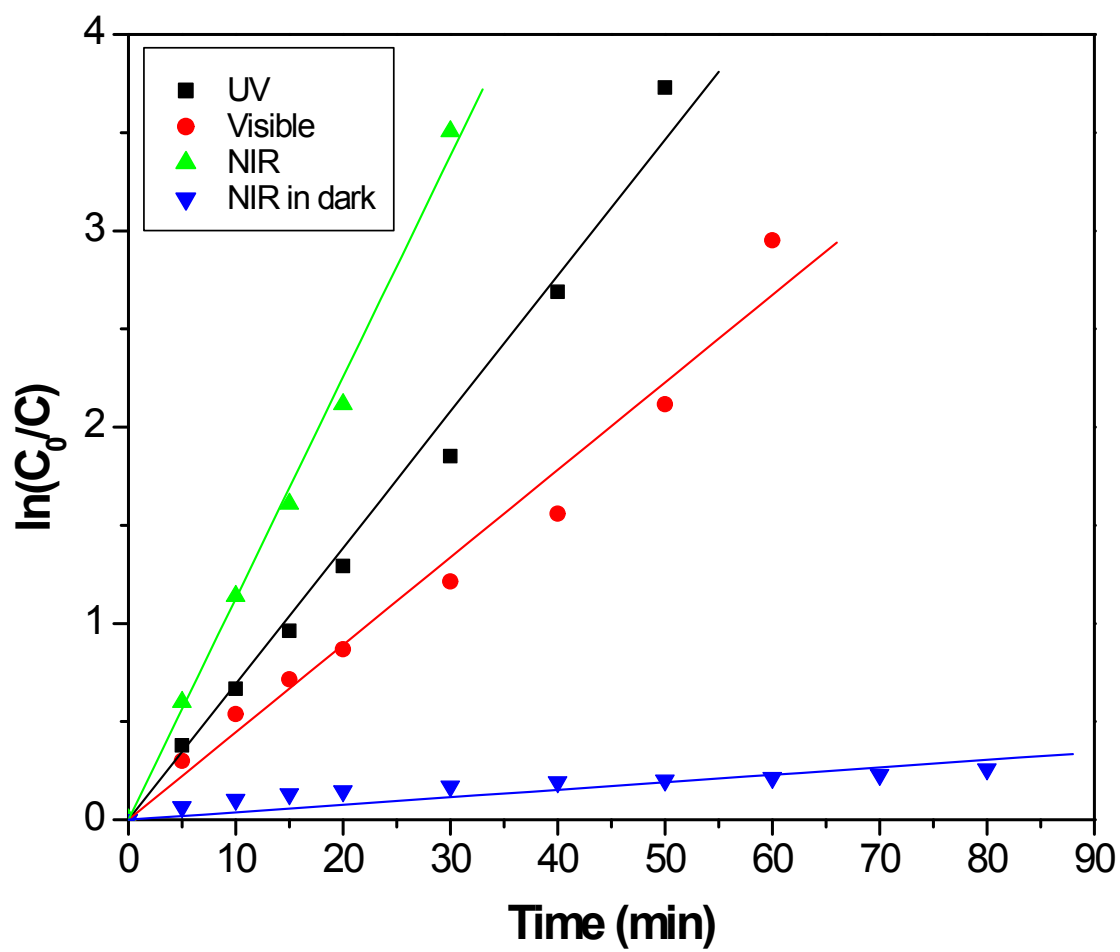

**Figure S12.** Langmuir-Hinshelwood plot for photodegradation of methyl orange under exposure to visible light, NIR laser and NIR laser in darkness.

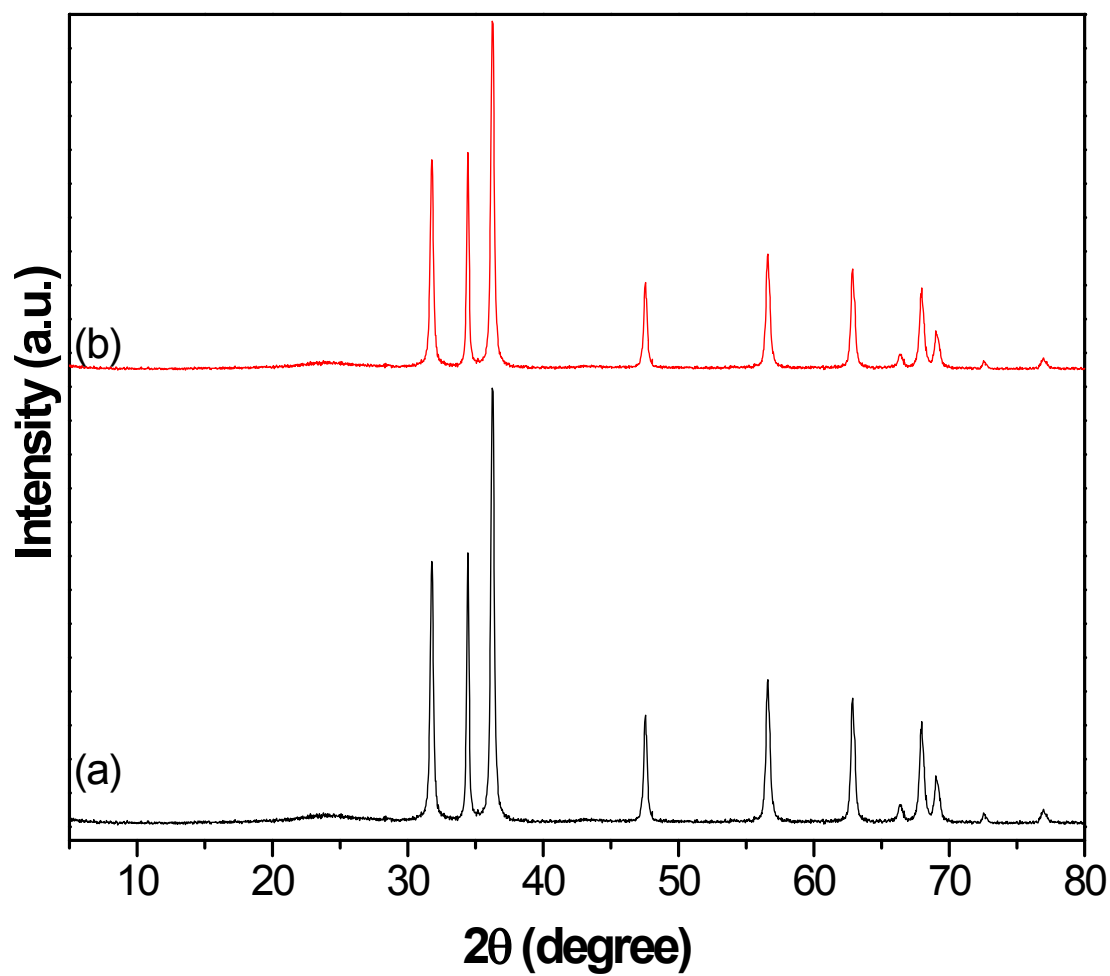

**Figure S13.** XRD patterns of GR-ZnO nanocatalyst (a) before and (b) after degradation of methyl orange under exposure to NIR laser.
